# Supplementary material
Source: Elsevier journal article supplement (https://www.sciencedirect.com/science/article/pii/S253006442200058X)
Supplement: mmc1 [file S253006442200058X:mmc1.pdf]

## Annex 1 - Detailed results of statistical analysis

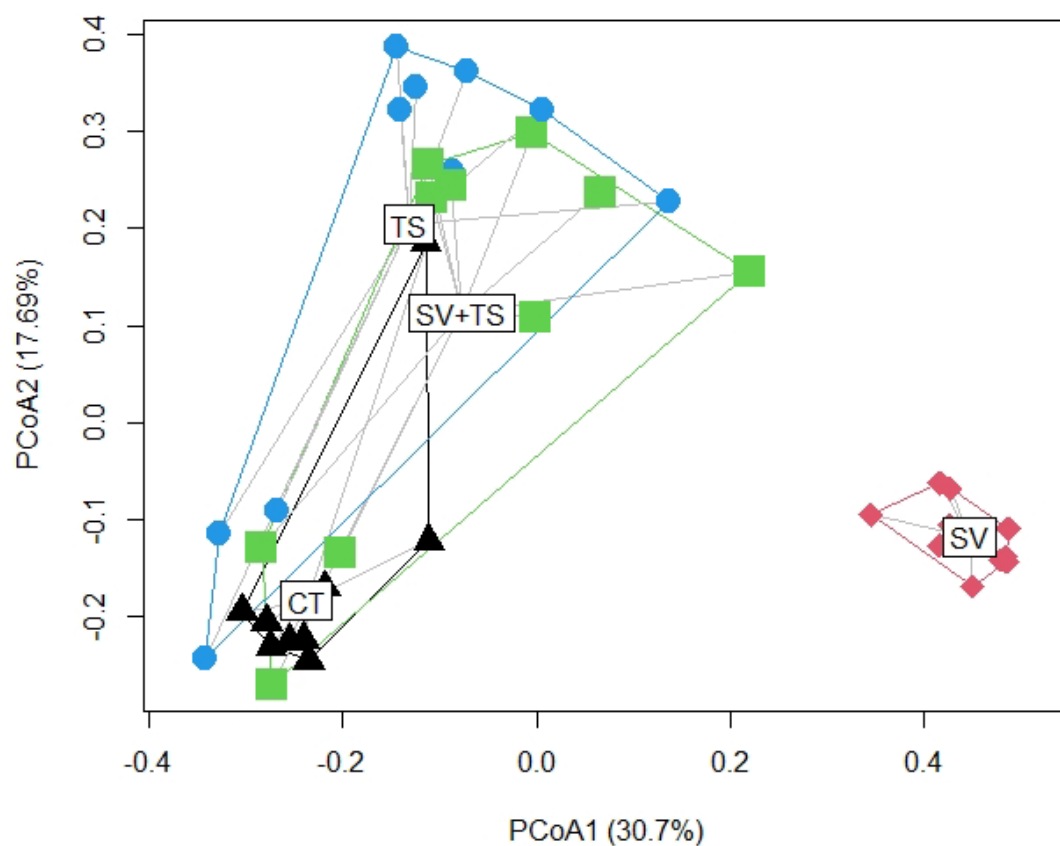

**Figure 1.** Principal Coordinate Analysis (PCoA) of vertebrate community composition (Jaccard distances) between the four treatments.

\*For these analyses, the data were grouped by transects, considering the years as repetitions and, therefore, grouped at the end.

```
> adonis2(tdm~Methodologies, data=tdm.Met, method = "jac", permutations = 1000) # sequential sequential
Permutation test for adonis under reduced model
Terms added sequentially (first to last)
Permutation: free
Number of permutations: 1000

adonis2(formula = tdm ~ Methodologies, data = tdm.Met, permutations = 1000, method = "jac")
      Df SumOfSqs      R2      F    Pr(>F)
Methodologies  3    3.9664 0.38179 7.4109 0.000999 ***
Residual      36    6.4226 0.61821
Total        39   10.3891 1.00000
---
Signif. codes:  0 '***' 0.001 '**' 0.01 '*' 0.05 '.' 0.1 ' ' 1
> pairwise.perm.manova(tdm.D,tdm.Met$Methodologies,nperm=1000, "jaccard")

      Pairwise comparisons using permutation MANOVAs on a distance matrix

data:  tdm.D by tdm.Met$Methodologies
1000 permutations

      Camera trap SG+TS  Sightings
SG+TS      0.0015      -      -
Sightings  0.0015      0.0015 -
Tracks and signs 0.0048      0.2627 0.0015

P value adjustment method: fdr
> |
```

**Figure 2.** Permutational Multivariate Analysis of Variance (PERMANOVA) performed in R Program with Vegan package.

\*For these analyses, the data were grouped by transects, considering the years as repetitions and, therefore, grouped at the end.

```
> permutest(perm, pairwise = TRUE, permutations = 1000) #PERMDISP result

Permutation test for homogeneity of multivariate dispersions
Permutation: free
Number of permutations: 1000

Response: Distances
      Df  Sum Sq  Mean Sq      F N.Perm  Pr(>F)
Groups  3 0.051098 0.0170326 2.548  1000 0.06593 .
Residuals 36 0.240649 0.0066847
---
Signif. codes:  0 '***' 0.001 '**' 0.01 '*' 0.05 '.' 0.1 ' ' 1

Pairwise comparisons:
(Observed p-value below diagonal, permuted p-value above diagonal)
      CT      SV      SV+TS      TS
CT      0.067932 0.111888 0.0430
SV      0.076072      0.685315 0.7233
SV+TS  0.109585 0.663546      0.4076
TS      0.049878 0.743372 0.435103
>
```

**Figure 3.** Multivariate permutation of dispersal analysis (PERMDISP) performed in R Program with Vegan package.

\*For these analyses, the data were grouped by transects, considering the years as repetitions and, therefore, grouped at the end.
